# Supplementary material
Source: publisher figshare collection journal article supplement (https://acs.figshare.com/ndownloader/files/4478554)

1. C 1s (280 – 340 eV) near-edge X-ray absorption fine structure (NEXAFS) spectra of  $\text{Fe}^{3+}/\text{HDTMA}^+$  SWy-2 montmorillonite particles. Intensity of the peak at 288.45 eV, relative to the pre-edge background (near 283 eV) was used to quantify C 1s signal corresponding to  $\text{HDTMA}^+$  in subsequent images.

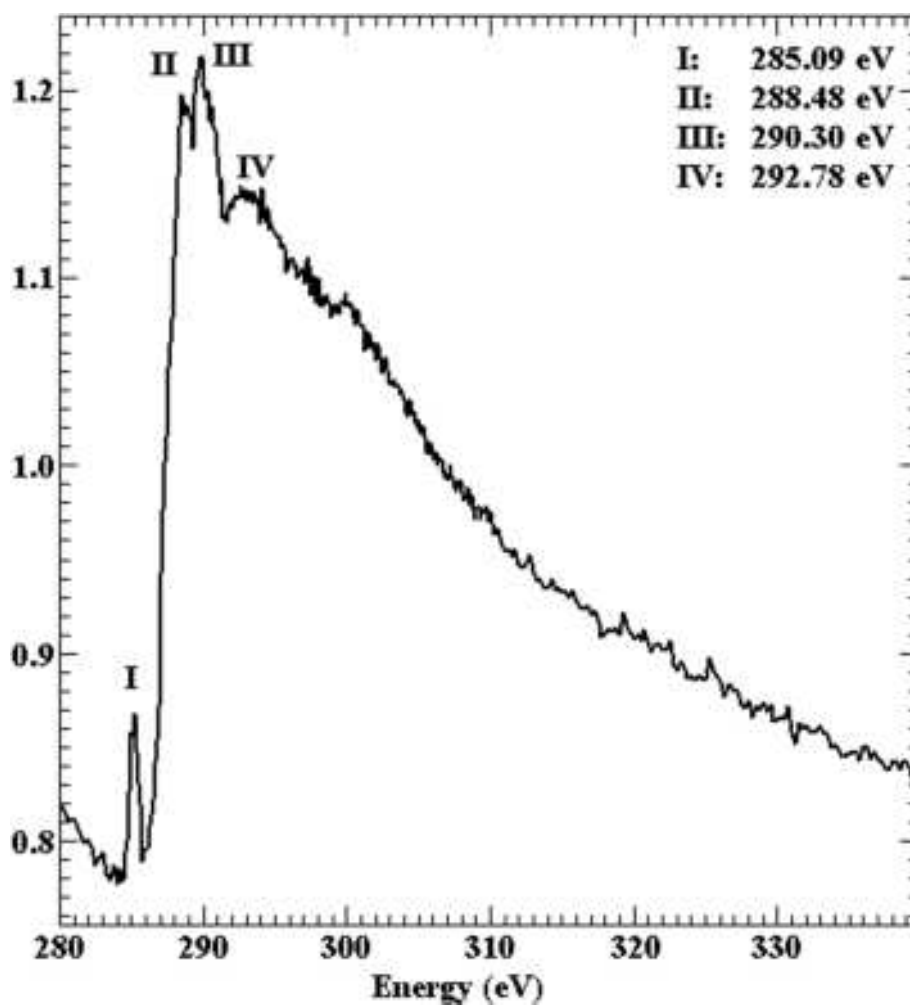

2. Fe 2p (700 – 740 eV) near-edge X-ray absorption fine structure (NEXAFS) spectra of Fe<sup>3+</sup>/HDTMA<sup>+</sup> SWy-2 montmorillonite particles. Intensity of the peak at 709.7 eV, relative to the pre-edge background (near 703 eV) was used to quantify Fe 2p signal corresponding to surface Fe<sup>3+</sup> in subsequent images.

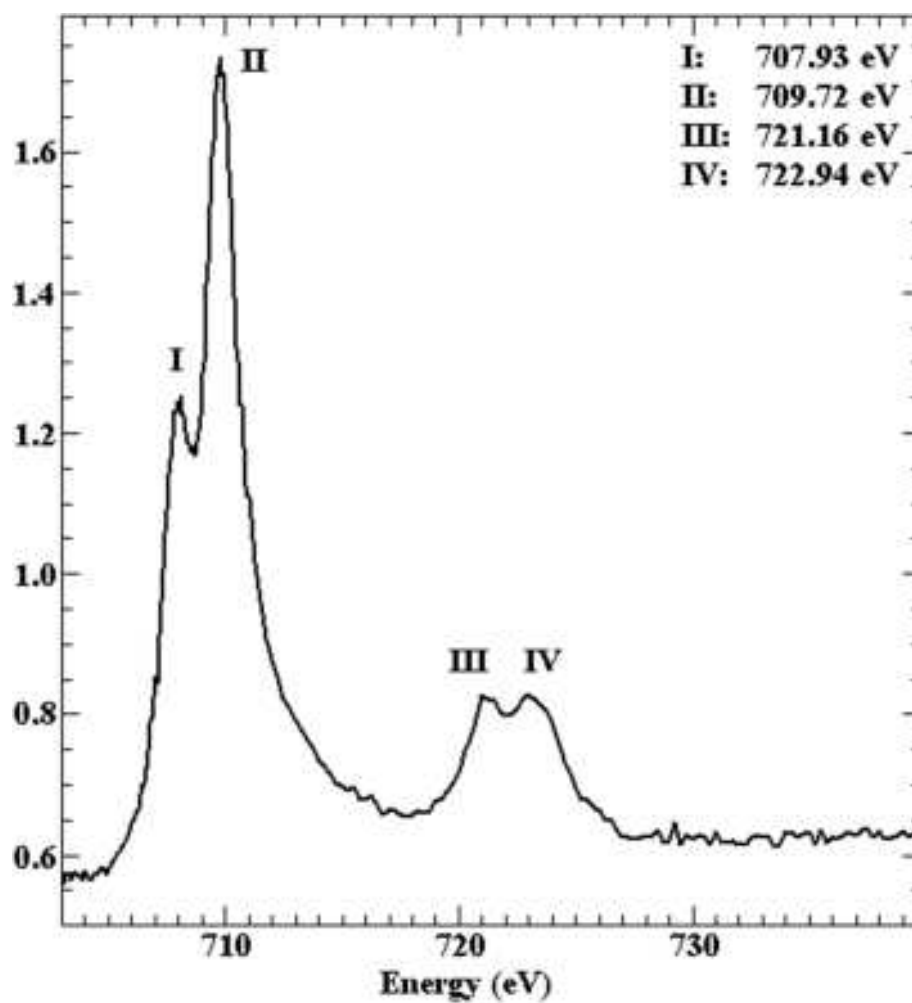

3. Raw STXM images for carbon (288.45-283 eV) and iron (709.7-703 eV)

Carbon

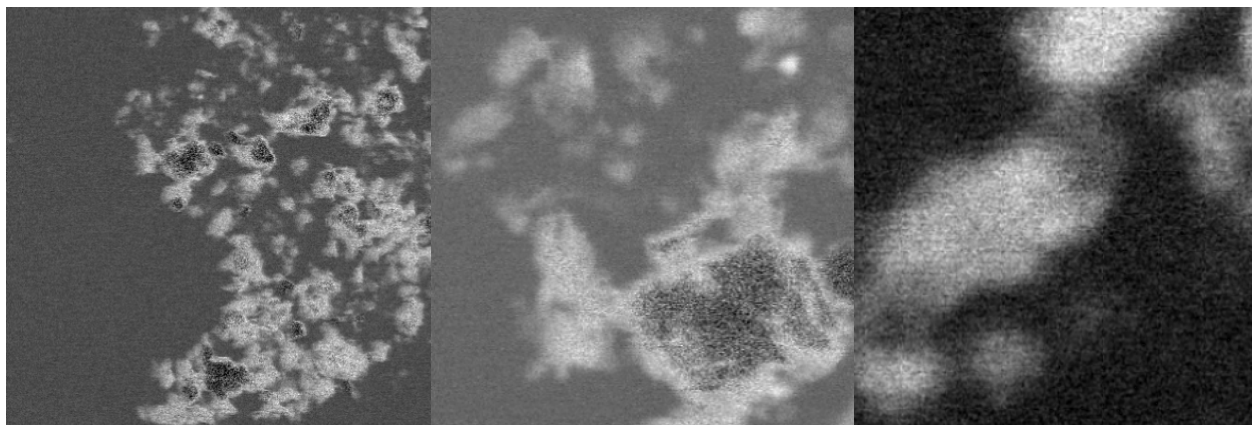

Iron

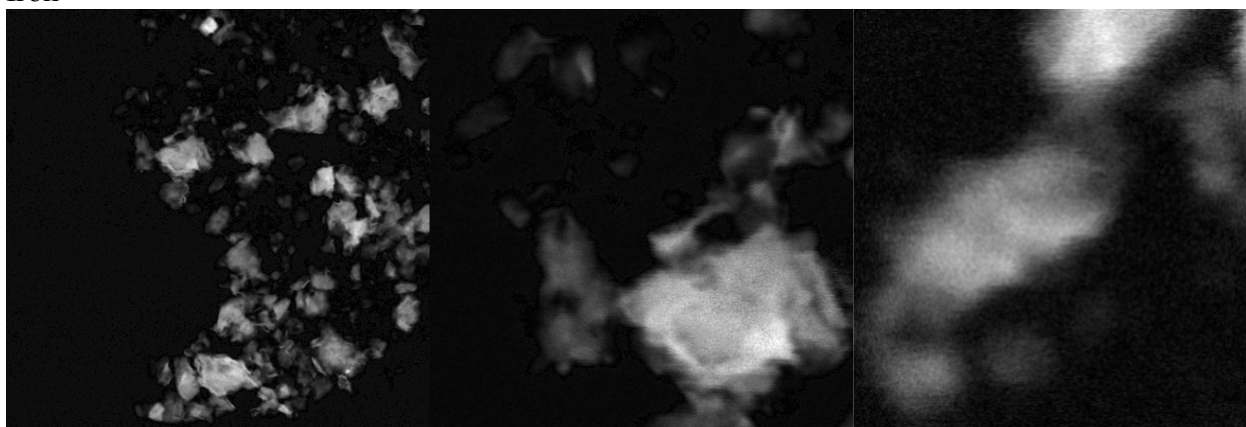

4. Conversion of 2-naphthol and anthrone promoted by  $\text{Fe}^{3+}$  SWy-2 and  $\text{Fe}^{3+}$ /HDTMA<sup>+</sup> SWy-2 series at 360 minutes.

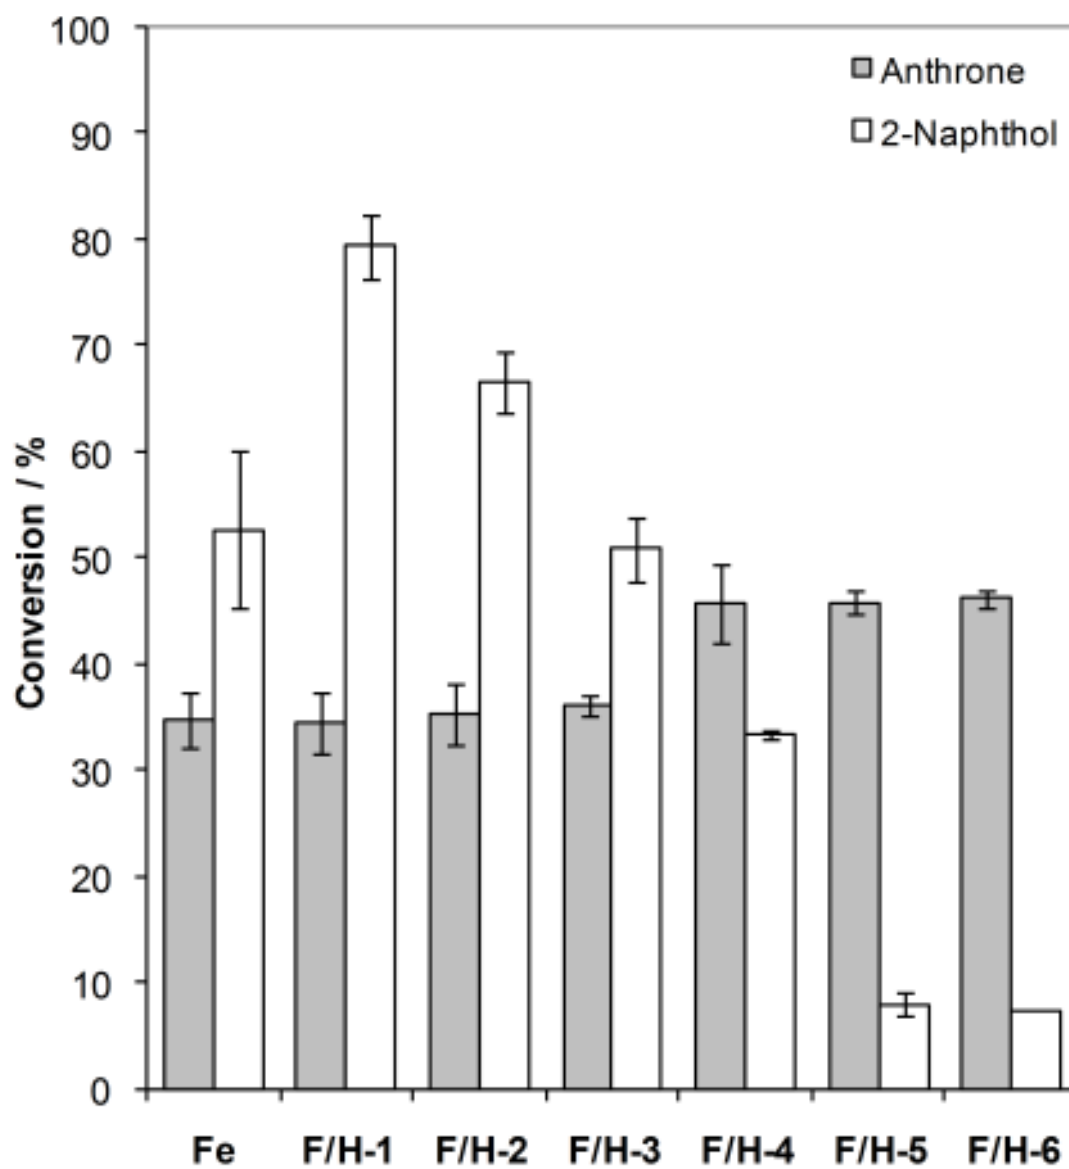

5. Snapshots of clay interlayers during dynamics simulations, showing top view and side view of a)  $\text{Na}^+$  SWy-2, b)  $\text{Fe}^{3+}$  SWy-2, c)  $\text{HDTMA}^+$  SWy-2 and d)  $\text{Fe}^{3+}/\text{HDTMA}^+$  SWy-2.

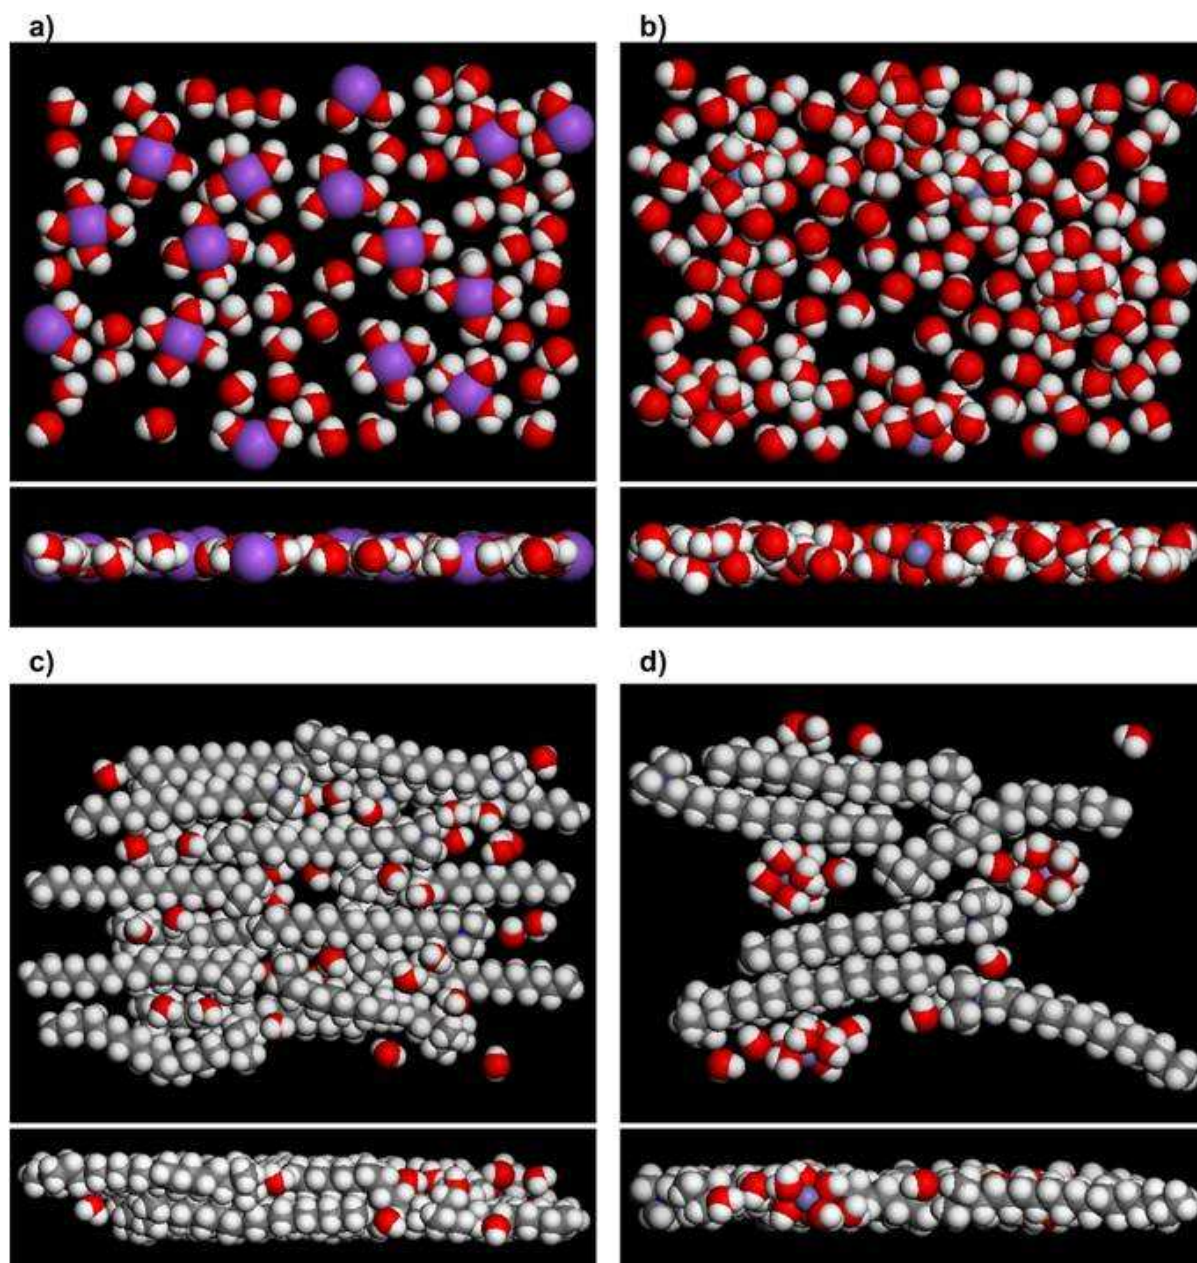

6. Mean squared displacements of molecular models a)  $\text{Na}^+$  in  $\text{Na}^+$  SWy-2, b)  $\text{Fe}^{3+}$  in  $\text{Fe}^{3+}$  SWy-2, c)  $\text{HDTMA}^+$  in  $\text{HDTMA}^+$  SWy-2 and d)  $\text{Fe}^{3+}$  in  $\text{Fe}^{3+}/\text{HDTMA}^+$  SWy-2.

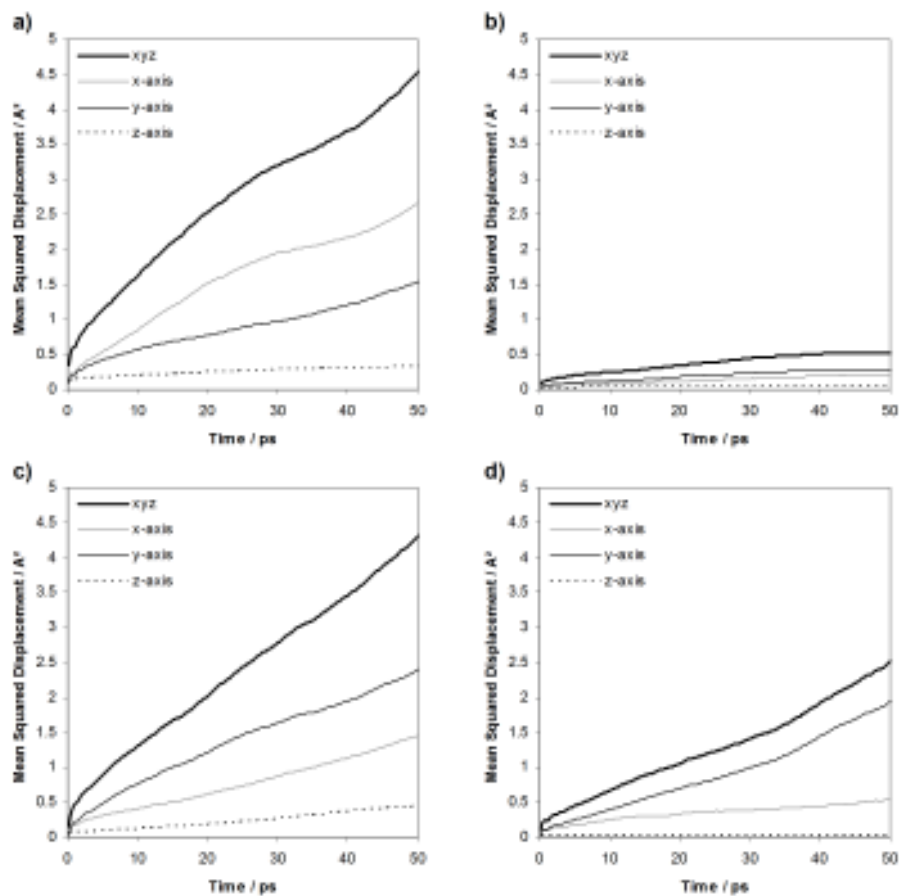

Supplement: Supplementary file 1 [file 4478554]
